# Supplementary material for: Bradycardia and Heart Rate Fluctuation Are Associated with a Prolonged Intensive Care Unit Stay in Patients with Severe COVID-19
Source: MDPI journal article supplement (doi:10.3390/medicina58070950), 2022-07-19
Supplement: s1 [file s1]

# Bradycardia and Heart Rate Fluctuation are Associated with a Prolonged Intensive Care Unit Stay in Patients with Severe COVID-19

## Supplement Materials

**Table S1** Multivariable analysis identifying bradycardia as a predictor of a prolonged ICU length of stay ( $\geq 7$  days) in severe COVID-19 pneumonia subjects.

| Risk Factors               | Risk Ratio | 95% CI     | p-value |
|----------------------------|------------|------------|---------|
| Model 1                    |            |            |         |
| Bradycardia                | 3.02       | 1.19, 7.66 | 0.020   |
| Model 2                    |            |            |         |
| Bradycardia                | 2.95       | 1.16, 7.54 | 0.023   |
| age                        | 1.00       | 0.98, 1.02 | 0.731   |
| Male                       | 0.86       | 0.46, 1.59 | 0.629   |
| Body mass index            | 1.00       | 0.95, 1.05 | 0.980   |
| Model 3                    |            |            |         |
| Bradycardia                | 2.84       | 1.11, 7.29 | 0.030   |
| age                        | 1.00       | 0.98, 1.02 | 0.832   |
| Male sex                   | 0.86       | 0.45, 1.62 | 0.631   |
| BMI                        | 0.99       | 0.94, 1.05 | 0.889   |
| C-reactive protein         | 1.00       | 0.99, 1.00 | 0.875   |
| Model 4                    |            |            |         |
| Bradycardia                | 2.67       | 1.02, 6.94 | 0.045   |
| age                        | 0.99       | 0.97, 1.02 | 0.865   |
| Male                       | 0.86       | 0.45, 1.62 | 0.632   |
| Body mass index            | 0.99       | 0.94, 1.05 | 0.877   |
| C-reactive protien         | 1.00       | 0.99, 1.00 | 0.937   |
| Mechanical ventilator used | 1.45       | 0.66, 3.16 | 0.351   |

**Note:** Model 1: Univariable analysis; Model 2: Multivariable analysis adjusted for pre-treatment covariates including age, sex, and BMI; Model 3: Multivariable analysis adjusted for pre-treatment covariates and laboratory results including age, sex, BMI, and CRP; Model 4: Multivariable analysis adjusted for pre-treatment covariates, laboratory results, and post-treatment including age, sex, BMI, CRP, and mechanical ventilator used.

**Table S2** Multivariable analysis identifying the high HR fluctuation during admission as a predictor of a prolonged ICU length of stay ( $\geq 7$  days) in severe COVID-19 pneumonia subjects.

| Risk Factors                         | Adjusted risks ratio | 95% CI     | p-value |
|--------------------------------------|----------------------|------------|---------|
| Model 1                              |                      |            |         |
| High HR fluctuation during admission | 3.13                 | 1.39, 7.03 | 0.006   |
| Model 2                              |                      |            |         |
| High HR fluctuation during admission | 3.25                 | 1.43, 7.39 | 0.005   |
| Age                                  | 1.00                 | 0.99, 1.02 | 0.442   |
| Male                                 | 0.93                 | 0.50, 1.72 | 0.815   |
| Body mass index                      | 0.99                 | 0.94, 1.05 | 0.940   |
| Model 3                              |                      |            |         |
| High HR fluctuation during admission | 3.03                 | 1.33, 6.89 | 0.008   |
| Age                                  | 1.01                 | 0.98, 1.03 | 0.442   |
| Male                                 | 0.95                 | 0.49, 1.79 | 0.867   |
| Body mass index                      | 0.99                 | 0.94, 1.05 | 0.930   |
| C-reactive protein                   | 1.00                 | 0.99, 1.00 | 0.760   |
| Model 4                              |                      |            |         |
| High HR fluctuation during admission | 2.88                 | 1.22, 6.78 | 0.016   |
| Age                                  | 1.00                 | 0.98, 1.03 | 0.639   |
| Male                                 | 0.93                 | 0.49, 1.77 | 0.833   |
| Body mass index                      | 0.99                 | 0.94, 1.05 | 0.919   |
| C-reactive protein                   | 1.00                 | 0.99, 1.00 | 0.801   |
| Mechanical ventilator used           | 1.19                 | 0.52, 2.74 | 0.668   |

**Note:** Model 1: Univariable analysis; Model 2: Multivariable analysis adjusted for pre-treatment covariates including age, sex, and BMI; Model 3: Multivariable analysis adjusted for pre-treatment covariates and laboratory results including age, sex, BMI, and CRP; Model 4: Multivariable analysis adjusted for pre-treatment covariates, laboratory results, and post-treatment including age, sex, BMI, CRP, and mechanical ventilator used.
